# Supplementary material for: Metabolic Fingerprinting of Feces from Calves, Subjected to Gram-Negative Bacterial Endotoxin
Source: MDPI journal article supplement (doi:10.3390/metabo11020108), 2021-02-13
Supplement: s1 [file s1]

## **Supporting information**

### **Metabolic Fingerprinting of Feces from Calves, Subjected to Gram Negative Bacterial Endotoxin**

Saeid Kamel Oroumieh <sup>1,2</sup>, Abbas Ali Naserian <sup>2</sup>, Lieven Van Meulebroek<sup>1</sup>, Ellen De Paepe<sup>1</sup>, Reza Valizadeh<sup>2</sup>, and Lynn Vanhaecke <sup>1,\*</sup>

<sup>1</sup> Laboratory of Chemical Analysis, Department of Veterinary Public Health and Food Safety, Faculty of Veterinary Medicine, Ghent University, Salisburylaan 133, 9820 Merelbeke, Belgium;

<sup>2</sup> Department of Animal Science, Faculty of Agriculture, Ferdowsi University of Mashhad, P.O. Box 91775-1163, Mashhad, Iran;

\* Correspondence: [Lynn.Vanhaecke@Ugent.be](mailto:Lynn.Vanhaecke@Ugent.be); Tel.: +32- (0)9-264-7457

**Table S1. Top-ranked chemical structures and their classification, as proposed by SIRIUS software for gram-negative bacterial endotoxin candidate markers.**

| ID | Rank                                                                         | Name                   | PubChem CID | Superclass                    | Class                            | Subclass                    | Parent Level 1         | Parent Level 2  |
|----|------------------------------------------------------------------------------|------------------------|-------------|-------------------------------|----------------------------------|-----------------------------|------------------------|-----------------|
| 1  | 1                                                                            | Amylamine              | 8060        | Organic nitrogen compounds    | Organonitrogen compounds         | Amines                      | Primary amines         | Monoalkylamines |
|    | 2                                                                            | 2-Aminopentane         | 12246       | Organic nitrogen compounds    | Organonitrogen compounds         | Amines                      | Primary amines         | Monoalkylamines |
|    | 3                                                                            | Isoamylamine           | 7894        | Organic nitrogen compounds    | Organonitrogen compounds         | Amines                      | Primary amines         | Monoalkylamines |
| 2  | 1                                                                            | N-Cyclobutylacetamide  | 23087721    | Organic acids and derivatives | Carboxylic acids and derivatives | Carboxylic acid derivatives | Carboxylic acid amides | Acetamides      |
|    | 2                                                                            | N-(3-Butenyl)acetamide | 13600051    | Organic acids and derivatives | Carboxylic acids and derivatives | Carboxylic acid derivatives | Carboxylic acid amides | Acetamides      |
|    | 3                                                                            | N-Ethyloxolan-2-imine  | 21720742    | Organoheterocyclic compounds  | Oxolanes                         | -                           | Oxolanes               | -               |
| 3  | No candidate structures could be retrieved for the assigned chemical formula |                        | -           | -                             | -                                | -                           | -                      | -               |
| 4  | 1                                                                            | Non-live               | 57449799    | Organic nitrogen compounds    | Organonitrogen compounds         | Amines                      | Aralkylamines          | -               |
|    | 2                                                                            | Non-live               | 57424791    | Organoheterocyclic compounds  | Diazines                         | Pyrazines                   | Methoxypyrazines       | -               |

|   |                                                                              |                                                   |          |                               |                                     |                                              |                               |            |
|---|------------------------------------------------------------------------------|---------------------------------------------------|----------|-------------------------------|-------------------------------------|----------------------------------------------|-------------------------------|------------|
| 5 | 3                                                                            | Non-live                                          | 57424804 | Organoheterocyclic compounds  | Diazines                            | Pyrazines                                    | Methoxypyrazines              | -          |
|   | 1                                                                            | 4-Acetamido-1-pentanol                            | 541465   | Organic acids and derivatives | Carboxylic acids and derivatives    | Carboxylic acid derivatives                  | Carboxylic acid amides        | Acetamides |
|   | 2                                                                            | N-[(S)-1-(Hydroxymethyl)butyl]acetamide           | 10464451 | Organic acids and derivatives | Carboxylic acids and derivatives    | Carboxylic acid derivatives                  | Carboxylic acid amides        | Acetamides |
|   | 3                                                                            | N-[(2R,4R)-4-Hydroxypentan-2-yl]acetamide         | 55299592 | Organic acids and derivatives | Carboxylic acids and derivatives    | Carboxylic acid derivatives                  | Carboxylic acid amides        | Acetamides |
| 6 | No candidate structures could be retrieved for the assigned chemical formula |                                                   | -        | -                             | -                                   | -                                            | -                             | -          |
|   | 1                                                                            | 2-Carbamoyl-2-cyanocyclopropane-1-carboxylic acid | 66771129 | Organic acids and derivatives | Carboxylic acids and derivatives    | Cyclopropanecarboxylic acids and derivatives | Cyclopropanecarboxylic acids  | -          |
|   | 2                                                                            | 4-Nitrophenylhydroxylamine                        | 5486551  | Benzenoids                    | Benzene and substituted derivatives | Nitrobenzenes                                | Nitrobenzenes                 | -          |
|   | 3                                                                            | 4-Amino-2-nitrophenol                             | 3417419  | Benzenoids                    | Phenols                             | Nitrophenols                                 | Nitrophenols                  | -          |
| 8 | No candidate structures could be retrieved for the assigned chemical formula |                                                   | -        | -                             | -                                   | -                                            | -                             | -          |
|   | 1                                                                            | N-(Prop-2-enoylamino)oxyprop-2-enamide            | 21319806 | Organic acids and derivatives | Carboxylic acids and derivatives    | Acrylic acids and derivatives                | Acrylic acids and derivatives | -          |
|   | 2                                                                            | 4(3H)-Pyrimidinone, 6-hydroxy-2-methoxy-5-methyl- | 58035213 | Organoheterocyclic compounds  | Diazines                            | Pyrimidines and pyrimidine derivatives       | Hydroxypyrimidines            | -          |

|    |   |                                                                              |           |                                  |                                     |                                      |                             |                                   |
|----|---|------------------------------------------------------------------------------|-----------|----------------------------------|-------------------------------------|--------------------------------------|-----------------------------|-----------------------------------|
| 10 | 3 | [(Z)-C-Ethenyl-N-hydroxycarbonimidoyl] (1E)-N-hydroxyprop-2-enimide          | 88660874  | Organic oxygen compounds         | Organooxygen compounds              | -                                    | Organooxygen compounds      | -                                 |
|    | 1 | Oxoverdazyl                                                                  | 102285420 | Organoheterocyclic compounds     | Imidolactams                        | -                                    | Imidolactams                | -                                 |
|    | 2 | -                                                                            | -         | -                                | -                                   | -                                    | -                           | -                                 |
|    | 3 | -                                                                            | -         | -                                | -                                   | -                                    | -                           | -                                 |
| 11 | 1 | N-(1-Hydroxybutan-2-yl)-2-methylpropanamide                                  | 43417884  | Organic acids and derivatives    | Carboxylic acids and derivatives    | Carboxylic acid derivatives          | Carboxylic acid amides      | Secondary carboxylic acid amides  |
|    | 2 | Ethyl [isopropyl(methyl)amino]acetat                                         | 23465149  | Organic acids and derivatives    | Carboxylic acids and derivatives    | Amino acids, peptides, and analogues | Amino acids and derivatives | Alpha amino acids and derivatives |
|    | 3 | 2-(Hydroxymethyl)-N-propan-2-ylbutanamide                                    | 117565592 | Not found                        | Not found                           | Not found                            | Not found                   | Not found                         |
| 12 | 1 | 1-(3-Hydroxyphenyl)propane-1,2-dione                                         | 17986404  | Benzenoids                       | Benzene and substituted derivatives | Phenylpropanes                       | Phenylpropanes              | -                                 |
|    | 2 | 3-(3,5-Dihydroxyphenyl)prop-2-enal                                           | 54245519  | Phenylpropanoids and polyketides | Cinnamaldehydes                     | -                                    | Cinnamaldehydes             | -                                 |
|    | 3 | (E)-3-(2,5-Dihydroxyphenyl)prop-2-enal                                       | 12023877  | Phenylpropanoids and polyketides | Cinnamaldehydes                     | -                                    | Cinnamaldehydes             | -                                 |
| 13 |   | No candidate structures could be retrieved for the assigned chemical formula | -         | -                                | -                                   | -                                    | -                           | -                                 |
| 14 | 1 | N,N-Dimethylimidazo[1,2-b]pyrazole-5-carboxamide                             | 67821321  | Not found                        | Not found                           | Not found                            | Not found                   | Not found                         |

|    |                                                                              |                                                            |           |                                 |                                  |                                      |                                           |                                   |
|----|------------------------------------------------------------------------------|------------------------------------------------------------|-----------|---------------------------------|----------------------------------|--------------------------------------|-------------------------------------------|-----------------------------------|
| 15 | 2                                                                            | N,N-Dimethylimidazo[1,2-b]pyrazole-1-carboxamide           | 19089098  | Organoheterocyclic compounds    | Azoles                           | Imidazoles                           | Substituted imidazoles                    | Carbonylimidazoles                |
|    | 3                                                                            | N-[(Dimethylamino)methylene]pyrazine-2-carboxamide         | 16727655  | Organoheterocyclic compounds    | Diazines                         | Pyrazines                            | Pyrazine carboxylic acids and derivatives | Pyrazinecarboxamides              |
|    | No candidate structures could be retrieved for the assigned chemical formula |                                                            | -         | -                               | -                                | -                                    | -                                         | -                                 |
| 16 | No candidate structures could be retrieved for the assigned chemical formula |                                                            | -         | -                               | -                                | -                                    | -                                         | -                                 |
| 17 | 1                                                                            | N-[2-(1H-Imidazol-5-yl)ethyl]-2,2-dimethylpropanamide      | 21360995  | Organoheterocyclic compounds    | Azoles                           | Imidazoles                           | Imidazoles                                | -                                 |
|    | 2                                                                            | N-[2-(1H-Imidazol-5-yl)ethyl]pentanamide                   | 24284602  | Lipids and lipid-like molecules | Fatty Acyls                      | Fatty amides                         | N-acyl amines                             | -                                 |
|    | 3                                                                            | Dolichotheline                                             | 168082    | Lipids and lipid-like molecules | Fatty Acyls                      | Fatty amides                         | N-acyl amines                             | -                                 |
| 18 | 1                                                                            | (2S)-2-Amino-N-butan-2-yl-4-methylsulfanylbutanamide       | 61148528  | Not found                       | Not found                        | Not found                            | Not found                                 | Not found                         |
|    | 2                                                                            | (2S)-2-Amino-N-(4-methylsulfanylbutan-2-yl)butanamide      | 103797251 | Organic acids and derivatives   | Carboxylic acids and derivatives | Amino acids, peptides, and analogues | Amino acids and derivatives               | Alpha amino acids and derivatives |
|    | 3                                                                            | (2S)-2-Amino-N-(2-methylpropyl)-4-methylsulfanylbutanamide | 22691833  | Organic acids and derivatives   | Carboxylic acids and derivatives | Amino acids, peptides, and analogues | Amino acids and derivatives               | Alpha amino acids and derivatives |
| 19 | 1                                                                            | N-(6-Acetamidohexyl)propanamide                            | 58534772  | Organic acids and derivatives   | Carboxylic acids and derivatives | Carboxylic acid derivatives          | Carboxylic acid amides                    | Acetamides                        |
|    | 2                                                                            | N-(7-Acetamidoheptyl)acetamide                             | 340007    | Organic acids and derivatives   | Carboxylic acids and derivatives | Carboxylic acid derivatives          | Carboxylic acid amides                    | Acetamides                        |

|    |                                                                                                     |                                                           |           |                                     |                                      |                                      |                                   |                                   |
|----|-----------------------------------------------------------------------------------------------------|-----------------------------------------------------------|-----------|-------------------------------------|--------------------------------------|--------------------------------------|-----------------------------------|-----------------------------------|
| 20 | 3                                                                                                   | N-(4-Acetamidobutyl)pentanamide                           | 110602639 | Lipids and lipid-like molecules     | Fatty Acyls                          | Fatty amides                         | N-acyl amines                     | -                                 |
|    | 1                                                                                                   | 2-Amino-N-(1-phenylpropan-2-yl)butanamide                 | 63011958  | Carboxylic acids and derivatives    | Amino acids, peptides, and analogues | Amino acids and derivatives          | Alpha amino acids and derivatives | Organic acids and derivatives     |
|    | 2                                                                                                   | N-Sec-Butyl-L-phenylalaninamide                           | 12968595  | Carboxylic acids and derivatives    | Amino acids, peptides, and analogues | Amino acids and derivatives          | Alpha amino acids and derivatives | Organic acids and derivatives     |
|    | 3                                                                                                   | (2S)-2-Amino-N-(1-phenylbutan-2-yl)propanamide            | 119313535 | Benzene and substituted derivatives | Phenethylamines                      | Amphetamines and derivatives         | Benzenoids                        | -                                 |
| 21 | No relevant fragmentation data could be acquired, for which structural elucidation was not possible |                                                           | -         | -                                   | -                                    | -                                    | -                                 | -                                 |
| 22 | No relevant fragmentation data could be acquired, for which structural elucidation was not possible |                                                           | -         | -                                   | -                                    | -                                    | -                                 | -                                 |
| 23 | 1                                                                                                   | N-[(1R,4R)-4-(Propionylamino)-1-methylpentyl]propionamide | 12102040  | Organic acids and derivatives       | Carboxylic acids and derivatives     | Carboxylic acid derivatives          | Carboxylic acid amides            | Secondary carboxylic acid amides  |
|    | 2                                                                                                   | N-[5-(Propanoylamino)hexyl]propanamide                    | 58779522  | Organic acids and derivatives       | Carboxylic acids and derivatives     | Carboxylic acid derivatives          | Carboxylic acid amides            | Secondary carboxylic acid amides  |
|    | 3                                                                                                   | Leucyl-l-leucinal                                         | 484685    | Organic acids and derivatives       | Carboxylic acids and derivatives     | Amino acids, peptides, and analogues | Amino acids and derivatives       | Alpha amino acids and derivatives |
| 24 | 1                                                                                                   | 6-Acetamido-N-(2-methylpropyl)hexanamide                  | 60653476  | Lipids and lipid-like molecules     | Fatty Acyls                          | Fatty amides                         | N-acyl amines                     | -                                 |

|    |   |                                                                                                     |           |                                 |                                  |                                           |                        |                   |
|----|---|-----------------------------------------------------------------------------------------------------|-----------|---------------------------------|----------------------------------|-------------------------------------------|------------------------|-------------------|
|    | 2 | 6-Acetamido-N-butan-2-ylhexanamide                                                                  | 60652726  | Lipids and lipid-like molecules | Fatty Acyls                      | Fatty amides                              | N-acyl amines          | -                 |
|    | 3 | N-(5-Acetamidooctyl)acetamide                                                                       | 57543871  | Organic acids and derivatives   | Carboxylic acids and derivatives | Carboxylic acid derivatives               | Carboxylic acid amides | Acetamides        |
|    |   |                                                                                                     |           |                                 |                                  |                                           |                        |                   |
| 25 | 1 | Non-live                                                                                            | 83431936  | Organoheterocyclic compounds    | Imidazopyridines                 | -                                         | Imidazopyridines       | -                 |
|    | 2 | Non-live                                                                                            | 83421718  | Organoheterocyclic compounds    | Imidazopyridines                 | -                                         | Imidazopyridines       | -                 |
|    | 3 | N-(2-Acetamidoethyl)-2-(methylamino)pyridine-3-carboxamide                                          | 55139084  | Organoheterocyclic compounds    | Pyridines and derivatives        | Pyridinecarboxylic acids and derivatives  | Pyridinecarboxamides   | Nicotinamides     |
| 26 | 1 | 5-Butyl-1,5-diisocyanatononane                                                                      | 87324424  | Organic nitrogen compounds      | Organonitrogen compounds         | Isocyanates                               | Isocyanates            | -                 |
|    | 2 | 1,9-Diisocyanato-5-methyl-5-propylnonane                                                            | 54160877  | Not found                       | Not found                        | Not found                                 | Not found              | Not found         |
|    | 3 | 2-[2-[Di(propan-2-yl)amino]ethoxy]-6-methoxyaniline                                                 | 104260349 | Benzenoids                      | Phenol ethers                    | Aminophenyl ethers                        | Aminophenyl ethers     | -                 |
| 27 |   | No relevant fragmentation data could be acquired, for which structural elucidation was not possible | -         | -                               | -                                | -                                         | -                      | -                 |
| 28 | 1 | N-[(5R,6R,7S,8R)-6,7,8,9-Tetrahydroxy-2-methyl-3,4-dioxonon-1-en-5-yl]acetamide                     | 23588580  | Organic oxygen compounds        | Organooxygen compounds           | Carbohydrates and carbohydrate conjugates | Aminosaccharides       | -                 |
|    | 2 | [(2R,3S,4R,5R)-5-Acetamido-4-acetyloxy-2-hydroxy-6-oxohexan-3-yl]acetate                            | 18610468  | No data available               | No data available                | No data available                         | No data available      | No data available |
|    | 3 | Triacetylmycosamine                                                                                 | 90479594  | Not found                       | Not found                        | Not found                                 | Not found              | Not found         |

|    |   |                                                                                                     |          |                                 |                                  |                                      |                             |                                   |
|----|---|-----------------------------------------------------------------------------------------------------|----------|---------------------------------|----------------------------------|--------------------------------------|-----------------------------|-----------------------------------|
| 29 |   | No relevant fragmentation data could be acquired, for which structural elucidation was not possible | -        | -                               | -                                | -                                    | -                           | -                                 |
| 30 | 1 | 7-[(1R,2S,5R)-2-Hydroxy-5-[(3S)-3-hydroxy-4-methyloct-1-en-6-ynyl]cyclopentyl]hept-5-enoic acid     | 57090564 | No data available               | No data available                | No data available                    | No data available           | No data available                 |
|    | 2 | (Z)-7-[(1R,2S,5R)-2-Hydroxy-5-[(E)-3-hydroxy-3-methyloct-1-en-6-ynyl]cyclopentyl]hept-5-enoic acid  | 70588329 | No data available               | No data available                | No data available                    | No data available           | No data available                 |
|    | 3 | 6a-Carbaprostaglandin I3                                                                            | 6438653  | No data available               | No data available                | No data available                    | No data available           | No data available                 |
| 31 |   | No relevant fragmentation data could be acquired, for which structural elucidation was not possible | -        | -                               | -                                | -                                    | -                           | -                                 |
| 32 |   | No relevant fragmentation data could be acquired, for which structural elucidation was not possible | -        | -                               | -                                | -                                    | -                           | -                                 |
| 33 | 1 | 6-[Bis[2-(2-methylpropylamino)-2-oxoethyl]amino]-N-hydroxyhexanamide                                | 11222529 | Organic acids and derivatives   | Carboxylic acids and derivatives | Amino acids, peptides, and analogues | Amino acids and derivatives | Alpha amino acids and derivatives |
|    | 2 | Leucylleucyllysine                                                                                  | 18222159 | Organic acids and derivatives   | Carboxylic acids and derivatives | Amino acids, peptides, and analogues | Peptides                    | Oligopeptides                     |
|    | 3 | 2-[[2-(2,6-Diaminohexanoylamino)-4-methylpentanoyl]amino]-4-methylpentanoic acid                    | 18222510 | Organic acids and derivatives   | Carboxylic acids and derivatives | Amino acids, peptides, and analogues | Peptides                    | Oligopeptides                     |
| 34 | 1 | (E)-4,5-Dihydroxy-11-[3-(methoxymethyl)-4-oxooctan-2-yl]-2,3,5,7-tetramethylundec-2-enoic acid      | 88601011 | Lipids and lipid-like molecules | Fatty Acyls                      | Fatty acids and conjugates           | Long-chain fatty acids      | -                                 |
|    | 2 | Methyl 11-(3-methoxymethyl-4-oxo-2-oxetanyl)-4,5-dihydroxy-3,5,7-trimethyl-2-undecenoate            | 54523016 | Not found                       | Not found                        | Not found                            | Not found                   | Not found                         |
|    | 3 | 5,6-Dihydroxyprostaglandin E1                                                                       | 6444125  | No data available               | No data available                | No data available                    | No data available           | No data available                 |
| 35 |   | No relevant fragmentation data could be acquired, for which structural elucidation was not possible | -        | -                               | -                                | -                                    | -                           | -                                 |



|    |                                                                                                     |   |   |   |   |   |   |
|----|-----------------------------------------------------------------------------------------------------|---|---|---|---|---|---|
| 36 | No relevant fragmentation data could be acquired, for which structural elucidation was not possible | - | - | - | - | - | - |
| 37 | No candidate structures could be retrieved for the assigned chemical formula                        | - | - | - | - | - | - |

**Table S2. The area under the curve for RT, HR, RR, TNF- $\alpha$ , and IL-6 in the LPS, DEX, FO, and CUR groups.**

| Item                       | Groups <sup>1</sup> |                   |                   |                   |       | P-Value |
|----------------------------|---------------------|-------------------|-------------------|-------------------|-------|---------|
|                            | LPS                 | FO                | CUR               | DEX               | SEM   |         |
| RT <sup>2</sup>            | 937.4               | 936.1             | 937.7             | 935.3             | 1.44  | 0.68    |
| HR <sup>3</sup>            | 2364                | 2424              | 2493              | 2300              | 151.6 | 0.58    |
| RR <sup>4</sup>            | 336.8               | 332.8             | 329.2             | 318.6             | 27.1  | 0.89    |
| TNF- $\alpha$ <sup>5</sup> | 23.9 <sup>a</sup>   | 21.6 <sup>a</sup> | 20.8 <sup>a</sup> | 9.2 <sup>b</sup>  | 3.43  | <0.01   |
| IL-6 <sup>6</sup>          | 57.7 <sup>a</sup>   | 54.3 <sup>a</sup> | 52.8 <sup>a</sup> | 16.9 <sup>b</sup> | 7.35  | <0.01   |

<sup>a,b</sup> Values with different superscripts are significantly different ( $P < 0.01$ ).

<sup>1</sup>Groups: LPS = positive control; FO = 350 mg/kg BW per day fish oil + LPS; CUR = 4 mg/kg BW per day nanocurcumin + LPS; DEX = 0.3 mg/kg BW dexamethasone + LPS. <sup>2</sup>RT = rectal temperature, AUC<sub>0-24h</sub> ( $^{\circ}\text{C} \times \text{h}$ ). <sup>3</sup>HR = heart rate, AUC<sub>0-24h</sub> (bpm  $\times$  h). <sup>4</sup>RR = respiratory rate, AUC<sub>0-6h</sub> (bpm  $\times$  h). <sup>5</sup> TNF- $\alpha$  = tumor necrotic factor  $\alpha$ , AUC<sub>0-4h</sub> (ng/mL  $\times$  h). <sup>6</sup>IL-6 = interleukin-6, AUC<sub>0-6h</sub> (ng/mL  $\times$  h).
